# Supplementary material
Source: PubMed Central journal article supplement (PMC5012507)

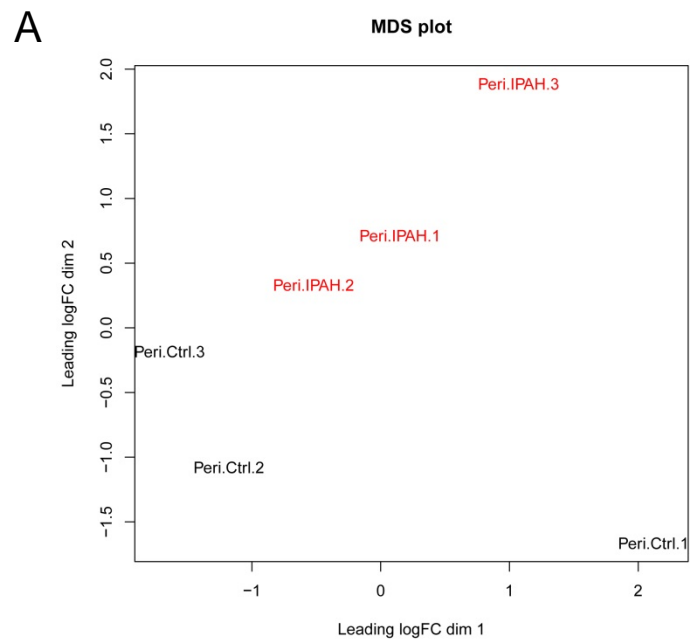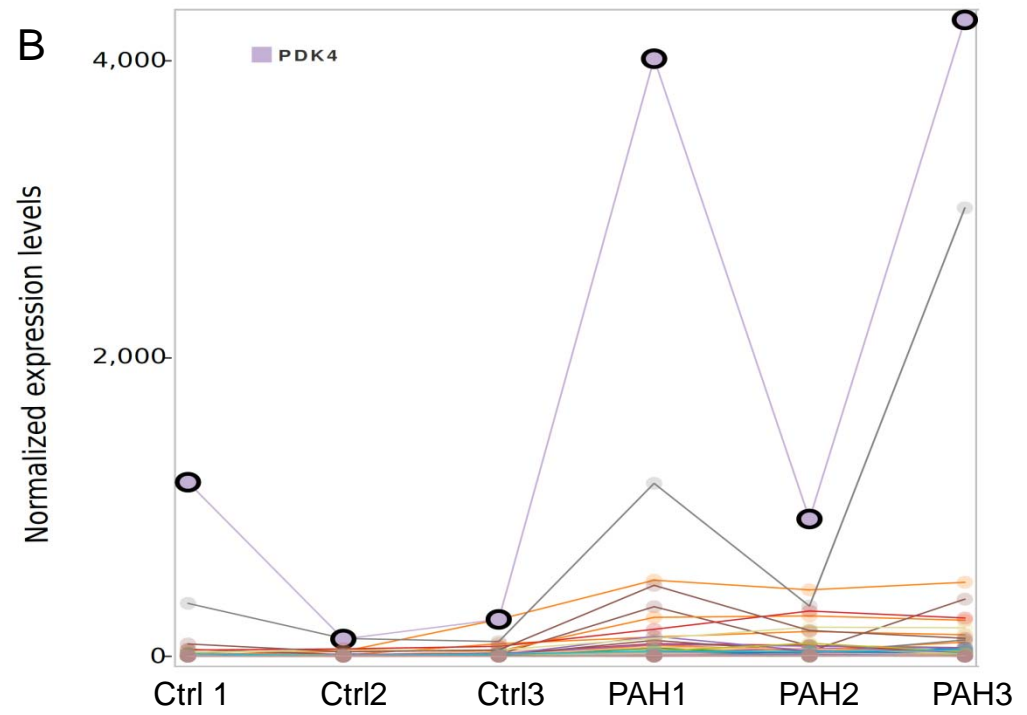

Supplement Figure 1

Supplement: mmc1.pdf [file mmc1.pdf]

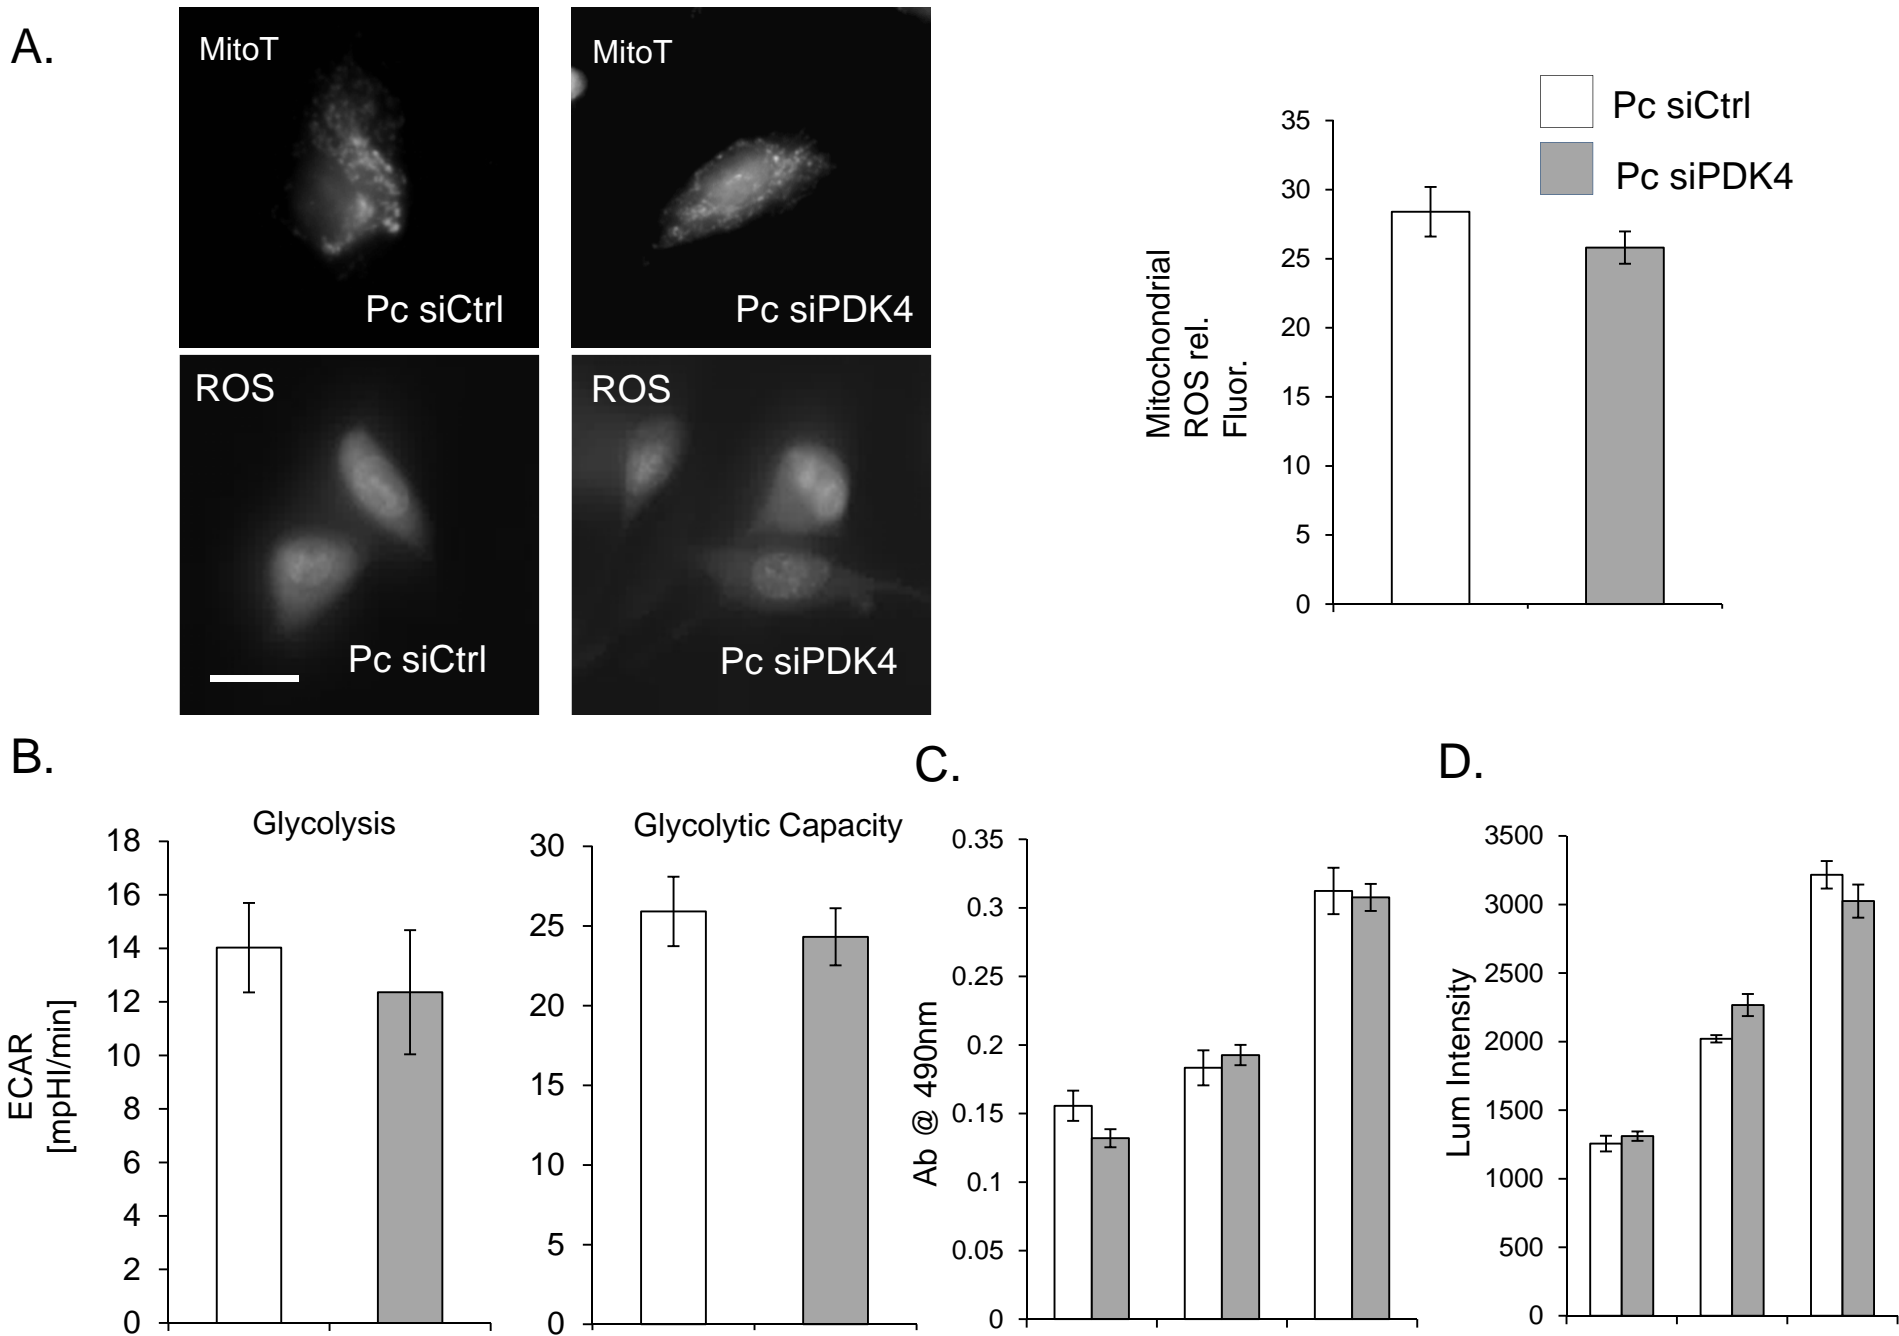

Supplement Figure 2

Supplement: mmc2.pdf [file mmc2.pdf]

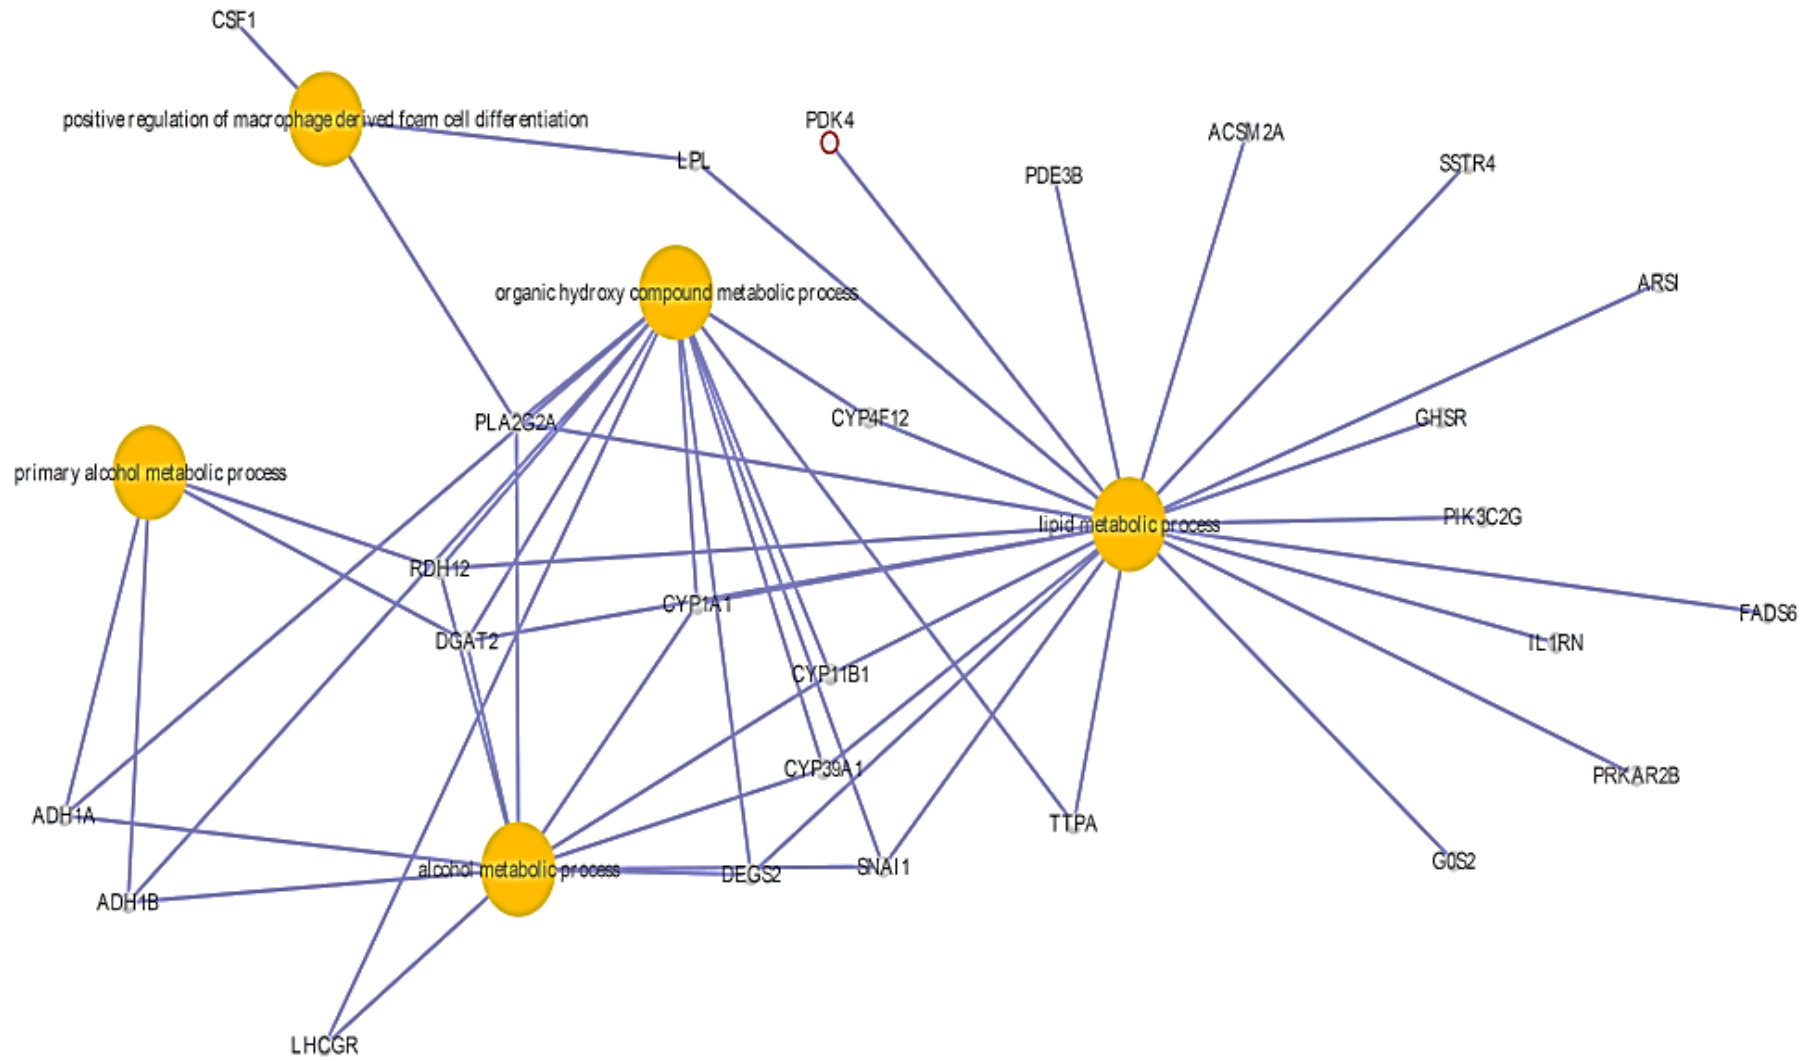

Supplement: mmc3.pdf [file mmc3.pdf]

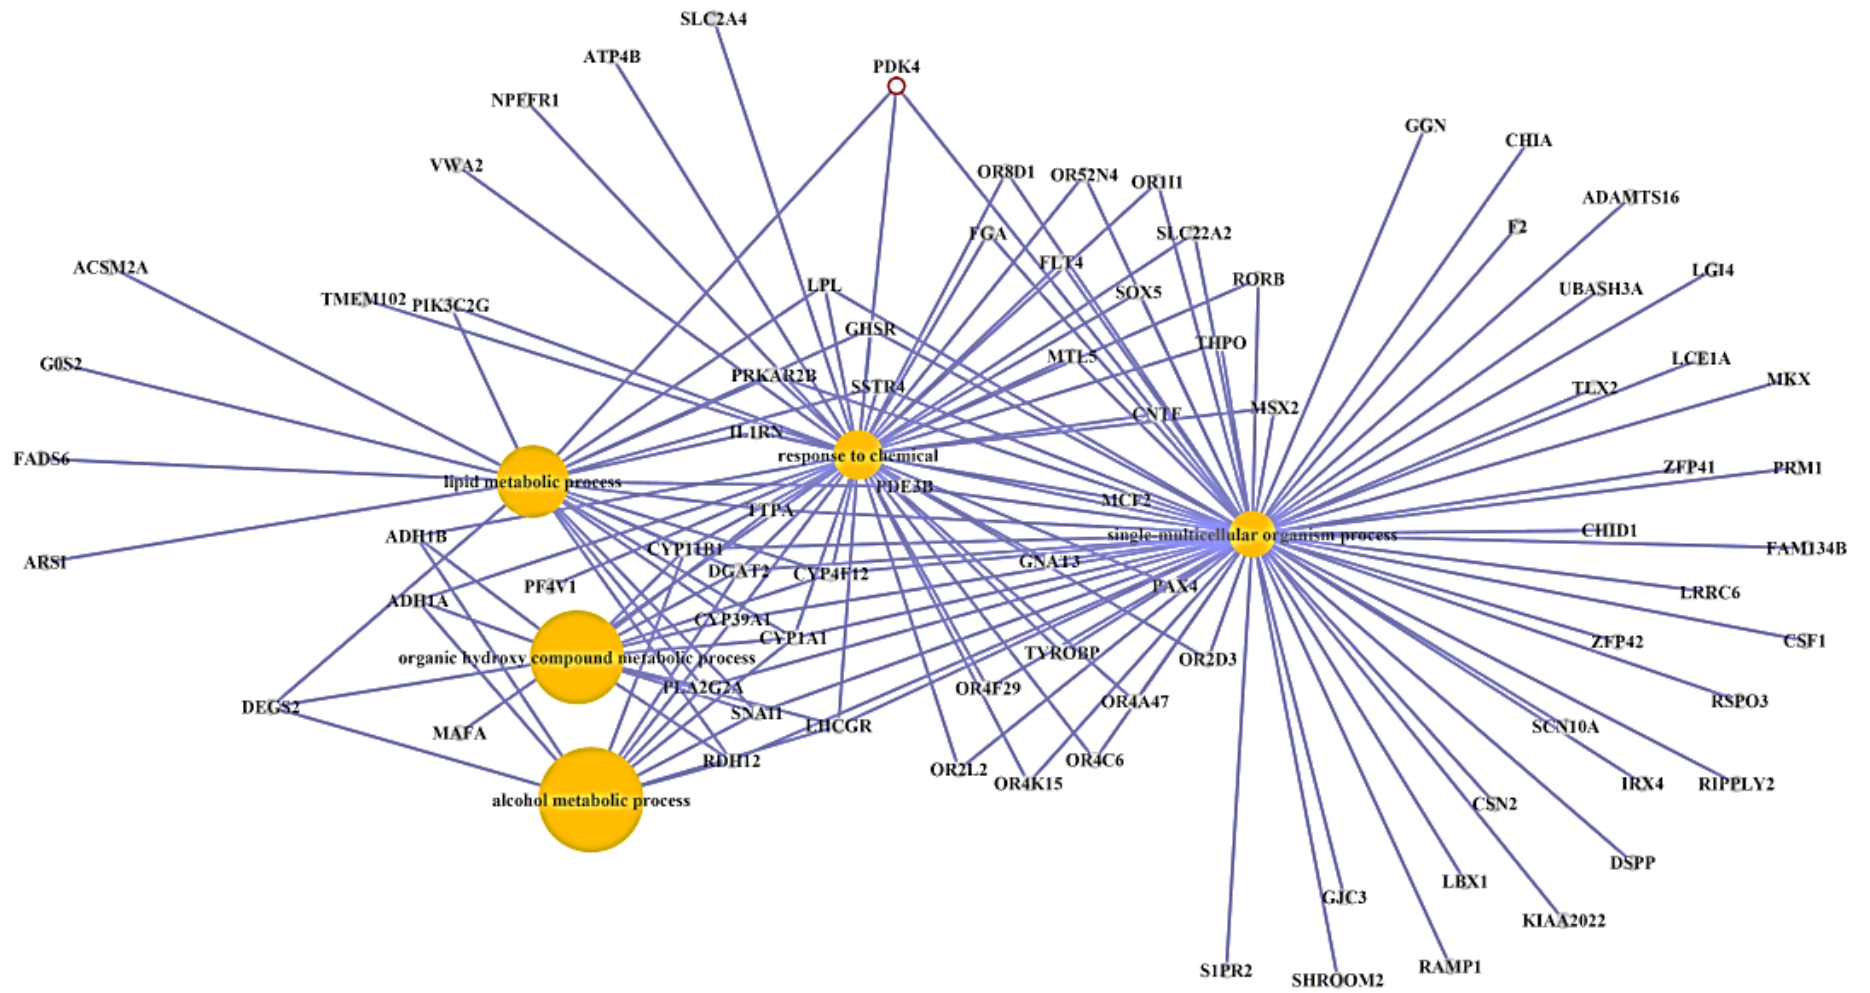

Supplement: mmc4.pdf [file mmc4.pdf]
